# Supplementary material
Source: Springer Nature journal article supplement (https://www.springermedizin.de/resource/supplementary/12904_2013_174_MOESM6_ESM.pdf/9517696)
Supplement: MOESM6 [file 9517696]

## Quantitative

(44%, n= 66)

- Surveys, questionnaires, standardised assessments (n=61)
- Database analysis (n=4)
- Randomised controlled trial (n=1)

## Qualitative

(38%, n=58)

- Individual / focus group interviews (n=45)
- Case studies (n=3)
- Documentary analysis/  
retrospective case note reviews (n= 10)

## Other

- Mixed methods (14%, n=21)
- Systematic review (4%; n=6)
